# Supplementary material
Source: PubMed Central journal article supplement (PMC4587693)
Supplement: ASN.2014070698_ASN2014070698SupplementaryData.pdf [file ASN.2014070698_ASN2014070698SupplementaryData.pdf]

## SUPPLEMENTAL MATERIAL

### Phenotype-Genotype Correlations and Estimated Carrier Frequencies of Primary Hyperoxaluria

Katharina Hopp<sup>1+</sup>, Andrea G Cogal<sup>1+</sup>, Eric J Bergstralh<sup>2</sup>, Barbara M Seide<sup>1</sup>, Julie B Olson<sup>1</sup>, Alicia M Meek<sup>1</sup>, John C Lieske<sup>1</sup>, Dawn S Milliner<sup>1, 4</sup>, Peter C Harris<sup>1,3\*</sup>, on behalf of the Rare Kidney Stone Consortium

\*These authors contributed equally to this work

<sup>1</sup>Division of Nephrology and Hypertension, <sup>2</sup>Division of Biomedical Statistics and Informatics, <sup>3</sup>Department of Biochemistry and Molecular Biology, <sup>4</sup>Division of Pediatric Nephrology, Mayo Clinic, 200 First Street SW, Rochester, MN 55905, USA

Corresponding Author:

\*Peter C. Harris

Division of Nephrology and Hypertension

Mayo Clinic

200 First Street SW

Rochester, MN 55905

Phone: 507-266-0541

Fax: 507-266-9315

email: [harris.peter@mayo.edu](mailto:harris.peter@mayo.edu)

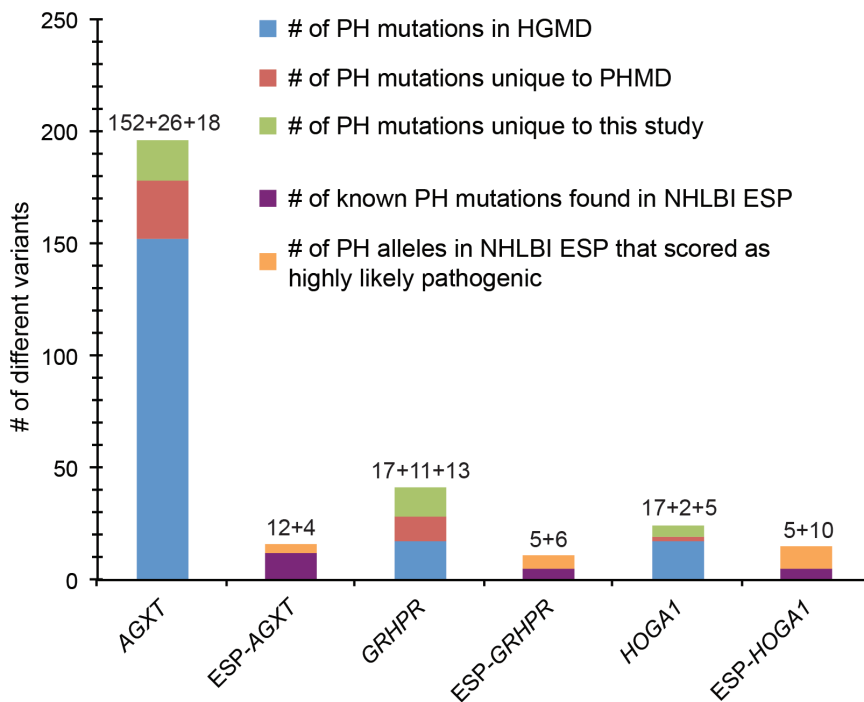

Supplemental Figure 1 | Number summary of different PH alleles in mutation databases and the NHLBI ESP.

Graph depicting the number of PH mutant alleles identified to date. Numbers are broken down by mutant alleles recorded in HGMD (blue), additional alleles recorded just in PHMD<sup>1</sup> (red), and novel alleles identified in this study (green, RKSC PH registry, Table 1). ESP: Number of PH mutations found within the NHLBI whole exome sequencing data set<sup>2</sup> (purple, Supplemental Table 7) and number of additional rare variants that scored as highly likely pathogenic within this dataset (orange, Supplemental Table 8).

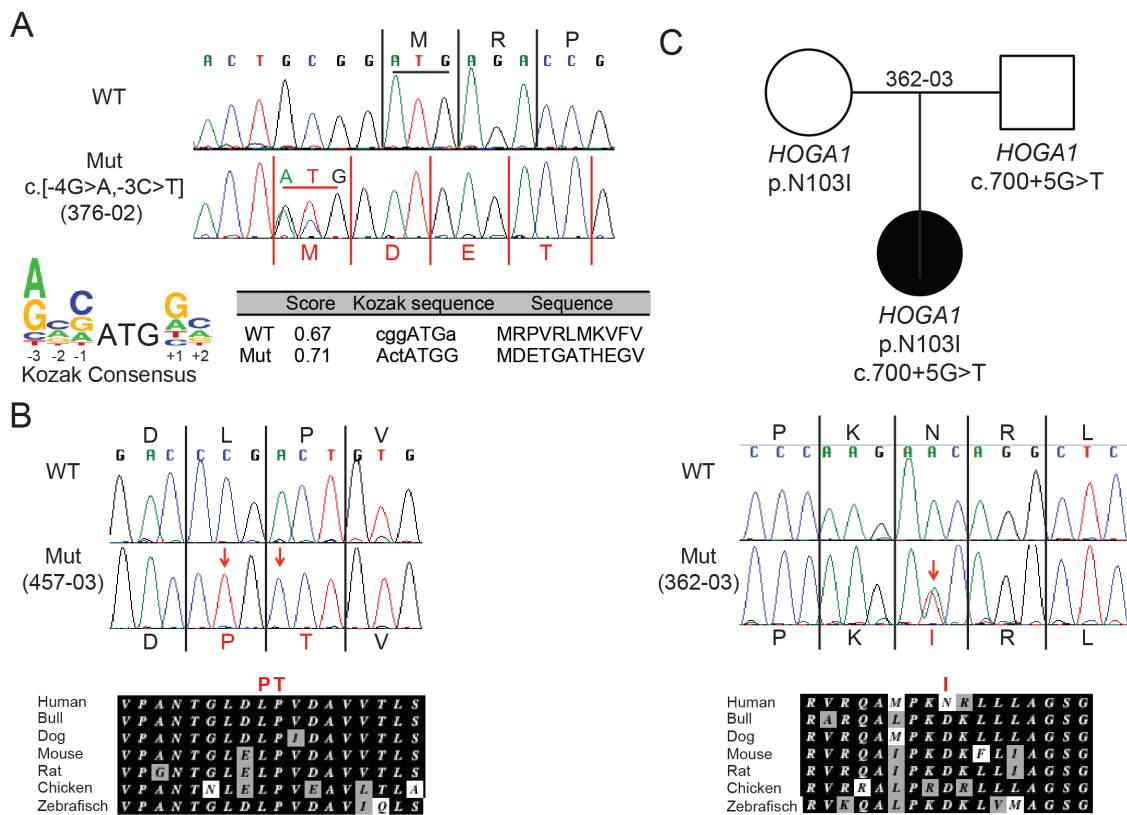

Supplemental Figure 2 | Depiction of three atypical, novel mutations found within the RKSC PH registry. (A) Sanger chromatogram and *in silico* analysis of the newly identified *GRHPR* transcription start site mutation. As illustrated by the human Kozak consensus sequence and in the table, the double mutation creates a novel and stronger start site at the -4 ATG position, creating a frameshifted novel protein. (B) Sanger chromatogram and multiple sequence alignment (MSA) of the two amino acid substitutions found in the first described PH3 patient to reach ESRD. (C) Pedigree, Sanger chromatogram, and MSA of a novel PH3 variant. This amino acid substitution did not score as highly likely pathogenic in all *in silico* tools (Table 1) because of the substitution found in other orthologs. However, the change in orthologs from asparagine to aspartic acid is chemically conservative while the mutation to a hydrophobic isoleucine is non-conservative.

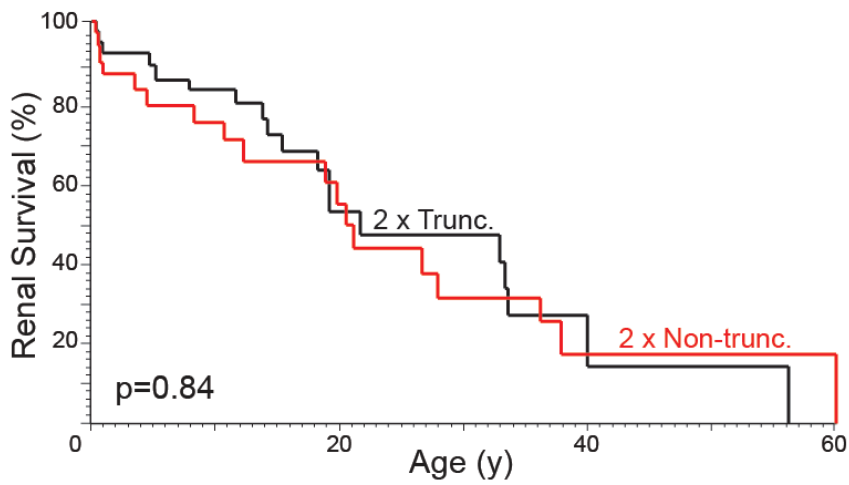

|                |          |         |   |
|----------------|----------|---------|---|
| 2 x Trunc.     | 52% (8)  | 13% (1) | - |
| 2 x Non-Trunc. | 54% (10) | 16% (2) | - |

Supplemental Figure 3 | Renal survival plot of allelic effect between patients with two *AGXT* non-miR non-truncating changes versus two *AGXT* truncating changes. Kaplan-Meier renal survival plot plus survival estimate tables for PH1 patients having either two truncating changes (37 patients) or two non-miR non-truncating changes (30 patients). The comparison shows no significant difference in renal survival between the groups.

Supplemental Table 1 | Evaluation of AGXT allelic effects on PH1 severity

|                                                                   | 2 x Trunc<br>N=37                        | 2 x Non-trunc<br>N=30                    | 2 x MiR<br>N=69                            | Trunc +<br>Non-trunc<br>N=14             | Trunc + MiR<br>N=60                       | Non-trunc +<br>MiR<br>N=37                | p-value<br>adjusted |
|-------------------------------------------------------------------|------------------------------------------|------------------------------------------|--------------------------------------------|------------------------------------------|-------------------------------------------|-------------------------------------------|---------------------|
| <b>Age at Symptoms<br/>yrs (median)</b><br>(Q1, Q3)<br>(Min, Max) | 4.3<br>(0.7, 7.6)<br>(0.2, 37.2)<br>N=33 | 5.9<br>(1.0, 9.6)<br>(0.1, 41.5)<br>N=23 | 10.6<br>(2.4, 22.0)<br>(0.5, 49.8)<br>N=59 | 3.6<br>(1.3, 5.9)<br>(0.2, 11.3)<br>N=12 | 4.5<br>(1.6, 10.0)<br>(0.1, 53.0)<br>N=53 | 7.5<br>(2.1, 17.0)<br>(0.1, 52.6)<br>N=33 | 0.028               |
| <b>Nephrocalcinosis</b><br>yes: N (%)<br>no: N (%)                | 11 (42.3%)<br>15 (57.7%)                 | 7 (36.8%)<br>12 (63.2%)                  | 7 (18.4%)<br>31 (81.6%)                    | 3 (37.5%)<br>5 (62.5%)                   | 15 (32.6%)<br>25 (67.4%)                  | 6 (26.1%)<br>17 (73.9%)                   | 0.36                |
| <b>Urine Chemistry<br/>(median)</b><br>(Q1, Q3)                   |                                          |                                          |                                            |                                          |                                           |                                           |                     |
| Ox24 mmol/1.73m <sup>2</sup><br>(normal < 0.46)*                  | 2.3<br>(1.6, 2.7)<br>N=12                | 2.0<br>(1.7, 3.0)<br>N=13                | 1.1<br>(0.7, 1.5)<br>N=26                  | 2.7<br>(1.8, 4.1)<br>N=7                 | 2.2<br>(1.5, 2.7)<br>N=42                 | 1.7<br>(1.3, 2.1)<br>N=21                 | 0.0002              |
| Ca24 mg/1.73m <sup>2</sup><br>(normal 100-300)*                   | 49.1<br>(32.7, 71.1)<br>N=9              | 58.9<br>(54.9, 68.3)<br>N=9              | 79.5<br>(29.0, 157.5)<br>N=19              | 34.8<br>(14.3, 45.5)<br>N=3              | 57.3<br>(32.6, 76.6)<br>N=33              | 51.1<br>(39.2, 96.2)<br>N=9               | 0.34                |
| Cit24 mg/1.73m <sup>2</sup><br>(normal 320-1240)*                 | 378.6<br>(67.3, 477.8)<br>N=10           | 157.7<br>(79.2, 460.2)<br>N=8            | 402.5<br>(125.4, 584.7)<br>N=16            | 195.1<br>(105.2, 281.7)<br>N=4           | 278.4<br>(158.1, 362.5)<br>N=27           | 96.1<br>(78.2, 1073.6)<br>N=9             | 0.83                |
| Glycolate mg/g creatinine<br>(normal 0-78)**                      | 301.0<br>(171.0, 458.0)<br>N=9           | 112.0<br>(87.5, 267.0)<br>N=12           | 45.0<br>(19.0, 143.0)<br>N=23              | 194.0<br>(165.0, 276.0)<br>N=5           | 88.0<br>(39.5, 186.5)<br>N=32             | 101.0<br>(64.0, 182.0)<br>N=15            | 0.011               |

\*Normal values are for adult patients. Values in table have been adjusted to BSA to permit comparison of adult and pediatric age patients<sup>3,4</sup>.

\*\*Normal values may be higher in children from birth to 5 years of age.

Trunc: nonsense, splice, frameshifting InDel; Non-trunc: missense and inframe InDel; MiR: p.G41R, p.F152I, p.G170R, p.I244T

Supplemental Table 2 | PH1 allelic effects, excluding patients with MiR alleles

|                                                                     | 2 x Trunc<br>N=37                        | Trunc + Non-trunc<br>N=14                | 2 x Non-trunc<br>N=30                    | p-value<br>adjusted |
|---------------------------------------------------------------------|------------------------------------------|------------------------------------------|------------------------------------------|---------------------|
| <b>Age at Symptoms<br/>yrs (median)<br/>(Q1, Q3)<br/>(Min, Max)</b> | 4.3<br>(0.7, 7.6)<br>(0.2, 37.2)<br>N=33 | 3.6<br>(1.3, 5.9)<br>(0.2, 11.3)<br>N=12 | 5.9<br>(1.0, 9.6)<br>(0.1, 41.5)<br>N=23 | 0.63                |
| <b>Nephrocalcinosis</b><br>yes: N (%)<br>no: N (%)                  | 11 (42.3%)<br>15 (57.7%)                 | 3 (37.5%)<br>5 (62.5%)                   | 7 (36.8%)<br>12 (63.2%)                  | 0.93                |
| <b>Urine Chemistry<br/>(median)<br/>(Q1, Q3)</b>                    |                                          |                                          |                                          |                     |
| Ox24 mmol/1.73m <sup>2</sup><br>(normal < 0.46)*                    | 2.3<br>(1.6, 2.7)<br>N=12                | 2.7<br>(1.8, 4.1)<br>N=7                 | 2.0<br>(1.7, 3.0)<br>N=13                | 0.42                |
| Ca24 mg/1.73m <sup>2</sup><br>(normal 100-300)*                     | 49.1<br>(32.7, 71.1)<br>N=9              | 34.8<br>(14.3, 45.5)<br>N=3              | 58.9<br>(54.9, 68.3)<br>N=9              | 0.37                |
| Cit24 mg/1.73m <sup>2</sup><br>(normal 320-1240)*                   | 378.6<br>(67.3, 477.8)<br>N=10           | 195.1<br>(105.2, 281.7)<br>N=4           | 157.7<br>(79.2, 460.2)<br>N=8            | 0.63                |
| Glycolate mg/g creatinine<br>(normal 0-78)**                        | 301.0<br>(171.0, 458.0)<br>N=9           | 194.0<br>(165.0, 276.0)<br>N=5           | 112.0<br>(87.5, 267.0)<br>N=12           | 0.23                |

\*Normal values are for adult patients. Values in table have been adjusted to BSA to permit comparison of adult and pediatric age patients<sup>3,4</sup>.

\*\*Normal values may be higher in children from birth to 5 years of age.

Supplemental Table 3 | Evaluation of *GRHPR* allelic effects on PH2 severity

|                                                                   | 2 x Trunc<br>N=21                         | Trunc + Non-trunc<br>N=7                 | 2 x Non-trunc<br>N=7                     | p-value<br>adjusted |
|-------------------------------------------------------------------|-------------------------------------------|------------------------------------------|------------------------------------------|---------------------|
| <b>Age at Symptoms<br/>yrs (median)</b><br>(Q1, Q3)<br>(Min, Max) | 9.2<br>(3.1, 19.8)<br>(0.6, 39.9)<br>N=18 | 7.4<br>(1.4, 15.2)<br>(0.8, 42.0)<br>N=7 | 4.4<br>(1.4, 11.1)<br>(1.3, 11.4)<br>N=6 | 0.76                |
| <b>Nephrocalcinosis</b><br>(yes)<br>(no)                          | 2 (11.1%)<br>16 (88.9%)                   | 1 (16.7%)<br>5 (83.3%)                   | 2 (33.3%)<br>4 (66.7%)                   | 0.58                |
| <b>Urine Chemistry<br/>(median)</b><br>(Q1, Q3)                   |                                           |                                          |                                          |                     |
| Ox24 mmol/1.73m <sup>2</sup><br>(normal < 0.46)*                  | 1.7<br>(1.5, 1.9)<br>N=13                 | 3.4<br>(0.7, 4.5)<br>N=6                 | 1.2<br>(1.1, 1.6)<br>N=4                 | 0.46                |
| Ca24 mg/1.73m <sup>2</sup><br>(normal 100-300)*                   | 80.0<br>(61.9, 141.4)<br>N=13             | 113.8<br>(77.2, 131.6)<br>N=4            | 62.7<br>(30.0, 95.4)<br>N=2              | 0.71                |
| Cit24 mg/1.73m <sup>2</sup><br>(normal 320-1240)*                 | 892.3<br>(335.5, 1285.0)<br>N=9           | 485.1<br>(74.3, 1372.4)<br>N=4           | 358.4<br>(245.2, 1285.0)<br>N=2          | 0.63                |
| L-glycerate mg/g creatinine<br>(normal 0-8)**                     | 870.0<br>(579.0, 2640.0)<br>N=13          | 347.0<br>(207.5, 705.0)<br>N=2           | 698.5<br>(271.0, 1126.0)<br>N=2          | 0.22                |

\*Normal values are for adult patients. Values in table have been adjusted to BSA to permit comparison of adult and pediatric age patients<sup>3,4</sup>.

\*\*Normal values may be higher in children from birth to 5 years of age.

Supplemental Table 4 | Allelic comparison of PH3 focusing on the most prevalent alleles

|                                                                   | Hom<br>c.700+5G>T<br>N=10              | Hom<br>p.E315del<br>N=8                  | Het/Comp. Het <sup>A</sup><br>N=16       | Other <sup>B</sup><br>N=4              | p-value<br>adjusted |
|-------------------------------------------------------------------|----------------------------------------|------------------------------------------|------------------------------------------|----------------------------------------|---------------------|
| <b>Age at Symptoms<br/>yrs (median)</b><br>(Q1, Q3)<br>(Min, Max) | 1.9<br>(0.4, 4.5)<br>(0.3, 8.7)<br>N=8 | 1.1<br>(0.6, 29.0)<br>(0.4, 31.0)<br>N=7 | 4.4<br>(1.1, 6.3)<br>(0.3, 28.3)<br>N=14 | 2.8<br>(1.1, 4.6)<br>(0.8, 5.1)<br>N=4 | 0.57                |
| <b>Nephrocalcinosis</b><br>yes: N (%)<br>no: N (%)                | 0 (0.0%)<br>10 (100.0%)                | 0 (0.0%)<br>8 (100.0%)                   | 1 (6.3%)<br>15 (93.8%)                   | 0 (0.0%)<br>3 (100.0%)                 | 0.72                |
| <b>Urine Chemistry<br/>(Median)<br/>(Q1, Q3)</b>                  |                                        |                                          |                                          |                                        |                     |
| Ox24 mmol/1.73m <sup>2</sup><br>(normal < 0.46)*                  | 1.0<br>(0.7, 1.3)<br>N=10              | 1.0<br>(0.8, 1.1)<br>N=6                 | 1.4<br>(1.1, 1.7)<br>N=15                | 1.0<br>(1.0, 1.3)<br>N=3               | 0.17                |
| Ca24 mg/1.73m <sup>2</sup><br>(normal 100-300)*                   | 82.1<br>(53.1, 153.0)<br>N=6           | 113.7<br>(82.7, 147.7)<br>N=5            | 77.3<br>(57.8, 142.1)<br>N=12            | 133.6<br>(72.3, 230.1)<br>N=3          | 0.43                |
| Cit24 mg/1.73m <sup>2</sup><br>(normal 320-1240)*                 | 573.3<br>(189.6, 698.8)<br>N=6         | 452.2<br>(416.3, 780.5)<br>N=5           | 710.9<br>(482.8, 915.7)<br>N=13          | 710.5<br>(405.7, 1073.7)<br>N=3        | 0.47                |

<sup>A</sup>common alleles c.700+5G>T and p.E315del

<sup>B</sup>2 x Non-trunc, Non-trunc + nonsense; note: only one PH3 patient carried a Trunc change heterozygously

\*Normal values are for adult patients. Values in table have been adjusted to BSA to permit comparison of adult and pediatric age patients<sup>3,4</sup>.



Supplemental Table 5 | Phenotypic heterogeneity associated (A) with homozygotes for common PH alleles and (B) among NMD patients

**A**

|             | # of patients | Age at symptoms (yrs) (min/max) | Nephro-calcinosis (#yes/no) | Ox24 mmol/1.73m <sup>2</sup> (min/max) | eGFR <sup>A</sup> ml/min/1.73m <sup>2</sup> (min(yrs)/max(yrs)) | # of patients with ESRD | Age at ESRD (yrs) (min/max) |
|-------------|---------------|---------------------------------|-----------------------------|----------------------------------------|-----------------------------------------------------------------|-------------------------|-----------------------------|
| <b>PH 1</b> |               |                                 |                             |                                        |                                                                 |                         |                             |
| c.33dupC    | 13            | 0.2/37.2                        | 5/6                         | 1.74/2.68                              | 12(1.0)/58(47.9)                                                | 9                       | 0.4/55.8                    |
| p.G170R     | 29            | 0.6/49.8                        | 1/13                        | 0.39/12.5                              | 73(0.0)/68(57.7)                                                | 17                      | 0.6/67.6                    |
| p.I244T     | 13            | 0.5/41.3                        | 4/4                         | 1.12/1.20                              | 47(14.1)/73(41.6)                                               | 8                       | 0.2/31.0                    |
| <b>PH 2</b> |               |                                 |                             |                                        |                                                                 |                         |                             |
| c.103delG   | 10            | 0.6/39.9                        | 1/7                         | 1.03/2.41                              | 2(21.5)/49(60.1)                                                | 1                       | 21.5                        |
| <b>PH 3</b> |               |                                 |                             |                                        |                                                                 |                         |                             |
| c.700+5G>T  | 10            | 0.3/8.7                         | 0/10                        | 0.49/1.41                              | 74(3.6)/101(20.3)                                               | 0                       | N/A                         |
| p.E315del   | 8             | 0.4/31.0                        | 0/8                         | 0.71/2.89                              | 99(0.6)/58(70)                                                  | 0                       | N/A                         |

<sup>A</sup>The reported eGFR/Age pairs are lowest eGFR at youngest age and highest eGFR at oldest age

**B**

|     | # of patients | Age at symptoms (yrs) (min/max) | Nephro-calcinosis (#yes/no) | Ox24 mmol/1.73m <sup>2</sup> (min/max) | eGFR <sup>A</sup> ml/min/1.73m <sup>2</sup> (min(yrs)/max(yrs)) | # of patients with ESRD | Age at ESRD (yrs) (min/max) |
|-----|---------------|---------------------------------|-----------------------------|----------------------------------------|-----------------------------------------------------------------|-------------------------|-----------------------------|
| NMD | 35            | 0.1/69.7                        | 6/24                        | 0.14/2.68                              | 84(4.0)/59(62.5)                                                | 2                       | 62.4/66.9                   |

<sup>A</sup>The reported eGFR/Age pairs are lowest eGFR at youngest age and highest eGFR at oldest age

Supplemental Table 6 | List of PH mutant alleles found in the NHLBI ESP

| Gene                                   | GRCh37 position | cDNA            | Protein     | Source DB <sup>A</sup> | EA Allele Count <sup>B</sup> | AA Allele Count <sup>B</sup> | All Allele Count <sup>B</sup> | EA MAF <sup>C</sup> (%) | AA MAF <sup>C</sup> (%) | All MAF <sup>C</sup> (%) | EA Genotype Count <sup>D</sup>              | AA Genotype Count <sup>D</sup>             | All Genotype Count <sup>D</sup>             | Avr. Sample RD <sup>E</sup> |
|----------------------------------------|-----------------|-----------------|-------------|------------------------|------------------------------|------------------------------|-------------------------------|-------------------------|-------------------------|--------------------------|---------------------------------------------|--------------------------------------------|---------------------------------------------|-----------------------------|
| AGXT                                   | 2:241808284     | c.2T>C          | p.(M1T)     | HGMD/PHDB              | 0/8596                       | 1/4395                       | 1/12991                       | 0                       | 0.023                   | 0.008                    | CC=0/CT=0/TT=4298                           | CC=0/CT=1/TT=2197                          | CC=0/CT=1/TT=6495                           | 22                          |
| AGXT                                   | 2:241808389     | c.107G>A        | p.(R36H)    | HGMD/PHDB              | 0/8598                       | 1/4405                       | 1/13003                       | 0                       | 0.023                   | 0.008                    | AA=0/AG=0/GG=4299                           | AA=0/AG=1/GG=2202                          | AA=0/AG=1/GG=6501                           | 46                          |
| AGXT                                   | 2:241808753     | c.332G>A        | p.(R111Q)   | HGMD/PHDB              | 1/8599                       | 0/4406                       | 1/13005                       | 0.012                   | 0                       | 0.008                    | AA=0/AG=1/GG=4299                           | AA=0/AG=0/GG=2203                          | AA=0/AG=1/GG=6502                           | 62                          |
| AGXT                                   | 2:241810796     | c.454T>A        | p.(F152I)   | HGMD/PHDB/RKSC         | 3/8591                       | 0/4396                       | 3/12987                       | 0.035                   | 0                       | 0.023                    | AA=0/AT=3/TT=4294                           | AA=0/AT=0/TT=2198                          | AA=0/AT=3/TT=6492                           | 26                          |
| AGXT                                   | 2:241810808     | c.466G>A        | p.(G156R)   | HGMD/PHDB/RKSC         | 1/8593                       | 0/4396                       | 1/12989                       | 0.012                   | 0                       | 0.008                    | AA=0/AG=1/GG=4296                           | AA=0/AG=0/GG=2198                          | AA=0/AG=1/GG=6494                           | 28                          |
| AGXT                                   | 2:241810850     | c.508G>A        | p.(G170R)   | HGMD/PHDB/RKSC         | 10/8578                      | 0/4392                       | 10/12970                      | 0.116                   | 0                       | 0.077                    | AA=0/AG=10/GG=4284                          | AA=0/AG=0/GG=2196                          | AA=0/AG=10/GG=6480                          | 24                          |
| AGXT                                   | 2:241812395     | c.525-1G>A      | N/A         | HGMD/PHDB/RKSC         | 1/8599                       | 0/4406                       | 1/13005                       | 0.012                   | 0                       | 0.008                    | AA=0/AG=1/GG=4299                           | AA=0/AG=0/GG=2203                          | AA=0/AG=1/GG=6502                           | 93                          |
| AGXT                                   | 2:241813402     | c.603C>A        | p.(D201E)   | HGMD/PHDB/RKSC         | 1/8599                       | 0/4406                       | 1/13005                       | 0.012                   | 0                       | 0.008                    | AA=0/AC=1/CC=4299                           | AA=0/AC=0/CC=2203                          | AA=0/AC=1/CC=6502                           | 106                         |
| AGXT                                   | 2:241814542     | c.697C>T        | p.(R233C)   | HGMD/PHDB/RKSC         | 0/8600                       | 2/4404                       | 2/13004                       | 0                       | 0.045                   | 0.015                    | TT=0/TC=0/CC=4300                           | TT=0/TC=2/CC=2201                          | TT=0/TC=2/CC=6501                           | 89                          |
| AGXT                                   | 2:241815397     | c.822G>C        | p.(E274D)   | HGMD/PHDB              | 2/8598                       | 0/4406                       | 2/13004                       | 0.023                   | 0                       | 0.015                    | CC=0/CG=0/GG=4298                           | CC=0/CG=0/GG=2203                          | CC=0/CG=2/GG=6501                           | 118                         |
| AGXT                                   | 2:241816973     | c.866G>A        | p.(R289H)   | PHDB                   | 2/7820                       | 7/4033                       | 9/11853                       | 0.026                   | 0.173                   | 0.076                    | AA=0/AG=2/GG=3909                           | AA=0/AG=7/GG=2013                          | AA=0/AG=9/GG=5922                           | 17                          |
| AGXT                                   | 2:241817471     | c.976delG       | p.(V326fs)  | HGMD/PHDB/RKSC         | 1/8247                       | 0/4266                       | 1/12513                       | 0.012                   | 0.000                   | 0.008                    | DelDel=0/DelRef=1/RefRef=4123               | DelDel=0/DelRef=0/RefRef=2133              | DelDel=0/DelRef=1/RefRef=6256               | 37                          |
| GRHPR <sup>1</sup>                     | 9:37424858      | c.103delG       | p.(D35fs)   | HGMD/PHDB/RKSC         | 11/8243                      | 5/4259                       | 16/12502                      | 0.133                   | 0.117                   | 0.128                    | <sup>4</sup> DelDel=0/DelRef=11/RefRef=4116 | <sup>4</sup> DelDel=0/DelRef=5/RefRef=2127 | <sup>4</sup> DelDel=0/DelRef=16/RefRef=6243 | 43                          |
| GRHPR                                  | 9:37430535      | c.626C>T        | p.(S209F)   | RKSC                   | 0/8600                       | 2/4404                       | 2/13004                       | 0                       | 0.045                   | 0.015                    | TT=0/TC=0/CC=4300                           | TT=0/TC=2/CC=2201                          | TT=0/TC=2/CC=6501                           | 110                         |
| GRHPR                                  | 9:37430644      | c.734+1G>A      | NA          | RKSC                   | 3/8597                       | 0/4406                       | 3/13003                       | 0.035                   | 0                       | 0.023                    | AA=0/AG=3/GG=4297                           | AA=0/AG=0/GG=2203                          | AA=0/AG=3/GG=6500                           | 61                          |
| GRHPR <sup>2</sup>                     | 9:37432037      | c.769dupG       | p.(A256fs)  | RKSC                   | 0/8254                       | 1/4263                       | 1/12517                       | 0                       | 0.024                   | 0.008                    | InsIns=0/InsRef=0/RefRef=4127               | InsIns=0/InsRef=1/RefRef=2131              | InsIns=0/InsRef=1/RefRef=6258               | 146                         |
| GRHPR                                  | 9:37436696      | c.904C>T        | p.(R302C)   | HGMD/PHDB              | 1/8599                       | 0/4406                       | 1/13005                       | 0.012                   | 0                       | 0.008                    | TT=0/TC=1/CC=4299                           | TT=0/TC=0/CC=2203                          | TT=0/TC=1/CC=6502                           | 204                         |
| HOGA1                                  | 10:99359537     | c.569C>T        | p.(P190L)   | HGMD/PHDB/RKSC         | 1/8599                       | 0/4406                       | 1/13005                       | 0.012                   | 0                       | 0.008                    | TT=0/TC=1/CC=4299                           | TT=0/TC=0/CC=2203                          | TT=0/TC=1/CC=6502                           | 75                          |
| HOGA1                                  | 10:99359925     | c.700+5G>T      | NA          | HGMD/PHDB/RKSC         | 26/8574                      | 2/4404                       | 28/12978                      | 0.302                   | 0.045                   | 0.215                    | TT=0/TG=26/GG=4274                          | TT=0/TG=2/GG=2201                          | TT=0/TG=28/GG=6475                          | 124                         |
| HOGA1                                  | 10:99371292     | c.860G>T        | p.(G287V)   | HGMD/PHDB/RKSC         | 1/8599                       | 0/4406                       | 1/13005                       | 0.012                   | 0                       | 0.008                    | TT=0/TG=1/GG=4299                           | TT=0/TG=0/GG=2203                          | TT=0/TG=1/GG=6502                           | 66                          |
| HOGA1                                  | 10:99371339     | c.907C>T        | p.(R303C)   | HGMD/PHDB/RKSC         | 1/8599                       | 0/4406                       | 1/13005                       | 0.012                   | 0                       | 0.008                    | TT=0/TC=1/CC=4299                           | TT=0/TC=0/CC=2203                          | TT=0/TC=1/CC=6502                           | 45                          |
| HOGA1 <sup>3</sup>                     | 10:99371368     | c.944_946delAGG | p.(E315del) | HGMD/PHDB/RKSC         | 4/8250                       | 0/4264                       | 4/12514                       | 0.049                   | 0                       | 0.032                    | DelDel=0/DelRef=4/RefRef=4123               | DelDel=0/DelRef=0/RefRef=2132              | DelDel=0/DelRef=4/RefRef=6255               | 39                          |
| <b>MTS Allele - AGT Mi<sup>F</sup></b> |                 |                 |             |                        |                              |                              |                               |                         |                         |                          |                                             |                                            |                                             |                             |
| AGXT                                   | 2:241808314     | c.32C>T         | p.(P11L)    |                        | 1749/6849                    | 269/4129                     | 2018/10978                    | 20.3419                 | 6.1164                  | 15.5279                  | TT=186/TC=1377/CC=2736                      | TT=7/TC=255/CC=1937                        | TT=193/TC=1632/CC=4673                      | 30                          |
| AGXT                                   | 2:241817516     | c.1020A>G       | p.(I340M)   |                        | 1788/6812                    | 282/4124                     | 2070/10936                    | 20.7907                 | 6.4004                  | 15.9157                  | GG=191/GA=1406/AA=2703                      | GG=9/GA=264/AA=1930                        | GG=200/GA=1670/AA=4633                      | 60                          |

<sup>A</sup> DB: Data Base, HGMD (Professional v27. 2013.3), PHDB (curated by Dr. Gill Rumsby), RKSC (RKSC PH registry)

<sup>B</sup> Represented as Alt/Ref, EA: European American, AA: African American, All: EA+AA

<sup>C</sup> MAF: Minor Allele Frequency

<sup>D</sup> Represented as AltAlt/AltRef/RefRef

<sup>E</sup> RD: Read Depth

<sup>F</sup> The alleles of the AGXT "minor allele (AGT-Mi) were not included in the P/CF analysis, MTS: mitochondrial targeting sequence

<sup>1</sup> Recorded in ESP as c.101delG, p.D35fs

<sup>2</sup> Recorded in ESP as c.767\_768insG, p.A257fs

<sup>3</sup> Recorded in ESP as c.937\_939delGAG, p. E313del

<sup>4</sup> c.103delG was called as DelDel 8 times in ESP6500 (4 in EA, 4 in AA). This likely reflects a miscall due to low coverage of the Alt allele. Hence, these allele and genotype counts were adjusted to reflect DelRef.

Supplemental Table 7 | List of variants found in the NHLBI ESP that scored as highly likely pathogenic using *in silico* tools

| Gene               | GRCh37 position | cDNA      | Protein    | Mutation Assessment <sup>A</sup>                   | EA Allele Count <sup>B</sup> | AA Allele Count <sup>B</sup> | All Allele Count <sup>B</sup> | EA MAF <sup>C</sup> (%) | AA MAF <sup>C</sup> (%) | All MAF <sup>C</sup> (%) | EA Genotype Count <sup>D</sup> | AA Genotype Count <sup>D</sup> | All Genotype Count <sup>D</sup> | Avr. Sample RD <sup>E</sup> |
|--------------------|-----------------|-----------|------------|----------------------------------------------------|------------------------------|------------------------------|-------------------------------|-------------------------|-------------------------|--------------------------|--------------------------------|--------------------------------|---------------------------------|-----------------------------|
| AGXT               | 2:241808773     | c.352C>A  | p.(R118S)  | C65/Affect Protein/Prob Damaging; 7/7              | 1/8599                       | 0/4406                       | 1/13005                       | 0.0116                  | 0                       | 0.0077                   | AA=0/AC=1/CC=4299              | AA=0/AC=0/CC=2203              | AA=0/AC=1/CC=6502               | 51                          |
| AGXT               | 2:241808774     | c.353G>C  | p.(R118P)  | C65/Affect Protein/Prob Damaging; 7/7              | 0/8600                       | 1/4405                       | 1/13005                       | 0                       | 0.0227                  | 0.0077                   | CC=0/CG=0/GG=4300              | CC=0/CG=1/GG=2202              | CC=0/CG=1/GG=6502               | 49                          |
| AGXT               | 2:241814555     | c.710C>T  | p.(P237L)  | C65/Affect Protein/Prob Damaging; 7/7              | 1/8599                       | 0/4406                       | 1/13005                       | 0.0116                  | 0                       | 0.0077                   | TT=0/TC=1/CC=4299              | TT=0/TC=0/CC=2203              | TT=0/TC=1/CC=6502               | 92                          |
| AGXT               | 2:241815384     | c.809A>G  | p.(Y270C)  | C55/Affect Protein/Prob Damaging; 5/7 <sup>F</sup> | 1/8599                       | 0/4406                       | 1/13005                       | 0.0116                  | 0                       | 0.0077                   | GG=0/GA=1/AA=4299              | GG=0/GA=0/AA=2203              | GG=0/GA=1/AA=6502               | 127                         |
| GRHPR              | 9:37426570      | c.323C>T  | p.(T108I)  | C65/Affect Protein/Prob Damaging; 7/7              | 1/8599                       | 0/4406                       | 1/13005                       | 0.0116                  | 0                       | 0.0077                   | TT=0/TC=1/CC=4299              | TT=0/TC=0/CC=2203              | TT=0/TC=1/CC=6502               | 129                         |
| GRHPR              | 9:37426617      | c.370C>T  | p.(R124C)  | C65/Affect Protein/Prob Damaging; 7/7              | 1/8599                       | 0/4406                       | 1/13005                       | 0.0116                  | 0                       | 0.0077                   | TT=0/TC=1/CC=4299              | TT=0/TC=0/CC=2203              | TT=0/TC=1/CC=6502               | 92                          |
| GRHPR              | 9:37429746      | c.511C>T  | p.(R171C)  | C65/Affect Protein/Prob Damaging; 7/7              | 1/8599                       | 0/4406                       | 1/13005                       | 0.0116                  | 0                       | 0.0077                   | TT=0/TC=1/CC=4299              | TT=0/TC=0/CC=2203              | TT=0/TC=1/CC=6502               | 102                         |
| GRHPR              | 9:37430565      | c.656C>T  | p.(T219I)  | C65/Affect Protein/Pos Damaging; 7/7               | 0/8600                       | 1/4405                       | 1/13005                       | 0                       | 0.0227                  | 0.0077                   | TT=0/TC=0/CC=4300              | TT=0/TC=1/CC=2202              | TT=0/TC=1/CC=6502               | 114                         |
| GRHPR <sup>1</sup> | 9:37432049      | c.780dupT | p.(G261fs) | N/A                                                | 0/8254                       | 1/4263                       | 1/12517                       | 0                       | 0.0235                  | 0.0080                   | InsIns=0/InsRef=0/RefRef=4127  | InsIns=0/InsRef=1/RefRef=2131  | InsIns=0/InsRef=1/RefRef=6258   | 150                         |
| GRHPR              | 9:37432076      | c.806A>G  | p.(D269G)  | C65/Affect Protein/Prob Damaging; 7/7              | 1/8599                       | 0/4406                       | 1/13005                       | 0.0116                  | 0                       | 0.0077                   | GG=0/GA=1/AA=4299              | GG=0/GA=0/AA=2203              | GG=0/GA=1/AA=6502               | 152                         |
| HOGA1              | 10:99344660     | c.200T>G  | p.(F67C)   | C65/Affect Protein/Pos Damaging; 4/7 <sup>F</sup>  | 1/8599                       | 0/4406                       | 1/13005                       | 0.0116                  | 0                       | 0.0077                   | GG=0/GT=1/TT=4299              | GG=0/GT=0/TT=2203              | GG=0/GT=1/TT=6502               | 67                          |
| HOGA1              | 10:99358589     | c.269T>A  | p.(L90H)   | C65/Affect Protein/Prob Damaging; 6/7              | 1/8599                       | 0/4406                       | 1/13005                       | 0.0116                  | 0                       | 0.0077                   | AA=0/AT=1/TT=4299              | AA=0/AT=0/TT=2203              | AA=0/AT=1/TT=6502               | 132                         |
| HOGA1              | 10:99358870     | c.365C>T  | p.(T122I)  | C65/Affect Protein/Pos Damaging; 6/7               | 2/8598                       | 0/4406                       | 2/13004                       | 0.0233                  | 0                       | 0.0154                   | TT=0/TC=2/CC=4298              | TT=0/TC=0/CC=2203              | TT=0/TC=2/CC=6501               | 93                          |
| HOGA1              | 10:99359453     | c.485C>T  | p.(P162L)  | C65/Affect Protein/Prob Damaging; 6/7              | 1/8599                       | 0/4406                       | 1/13005                       | 0.0116                  | 0                       | 0.0077                   | TT=0/TC=1/CC=4299              | TT=0/TC=0/CC=2203              | TT=0/TC=1/CC=6502               | 99                          |
| HOGA1              | 10:99359503     | c.535C>T  | p.(P179S)  | C65/Affect Protein/Benign; 7/7                     | 1/8599                       | 0/4406                       | 1/13005                       | 0.0116                  | 0                       | 0.0077                   | TT=0/TC=1/CC=4299              | TT=0/TC=0/CC=2203              | TT=0/TC=1/CC=6502               | 80                          |
| HOGA1              | 10:99359509     | c.541G>C  | p.(D181H)  | C65/Affect Protein/Pos Damaging; 6/7               | 1/8599                       | 0/4406                       | 1/13005                       | 0.0116                  | 0                       | 0.0077                   | CC=0/CG=1/GG=4299              | CC=0/CG=0/GG=2203              | CC=0/CG=1/GG=6502               | 80                          |
| HOGA1              | 10:99359552     | c.584T>C  | p.(M195T)  | C65/Affect Protein/Benign; 1/7 <sup>F</sup>        | 1/8599                       | 0/4406                       | 1/13005                       | 0.0116                  | 0                       | 0.0077                   | CC=0/CT=1/TT=4299              | CC=0/CT=0/TT=2203              | CC=0/CT=1/TT=6502               | 71                          |
| HOGA1              | 10:99359567     | c.599G>A  | p.(G200D)  | C65/Affect Protein/Prob Damaging; 7/7              | 1/8599                       | 0/4406                       | 1/13005                       | 0.0116                  | 0                       | 0.0077                   | AA=0/AG=1/GG=4299              | AA=0/AG=0/GG=2203              | AA=0/AG=1/GG=6502               | 61                          |
| HOGA1              | 10:99361698     | c.785G>A  | p.(W262*)  | N/A                                                | 0/8600                       | 1/4403                       | 1/13003                       | 0                       | 0.0227                  | 0.0077                   | AA=0/AG=0/GG=4300              | AA=0/AG=1/GG=2201              | AA=0/AG=1/GG=6501               | 30                          |
| HOGA1              | 10:99361724     | c.811C>T  | p.(R271C)  | C65/Affect Protein/Prob Damaging; 7/7              | 1/8599                       | 0/4402                       | 1/13001                       | 0.0116                  | 0                       | 0.0077                   | TT=0/TC=1/CC=4299              | TT=0/TC=0/CC=2201              | TT=0/TC=1/CC=6500               | 23                          |

<sup>A</sup> *In Silico* scoring, AlignGVGD/SIFT/PolyPhen2; MSA: Multi Sequence Alignment = 7 protein orthologs (human, bull, mouse, rat, dog, chicken, zebrafish)

<sup>B</sup> represented as Alt/Ref, EA: European American, AA: African American, All: EA+AA

<sup>C</sup> MAF: Minor Allele Frequency

<sup>D</sup> represented as AltAlt/AltRef/RefRef

<sup>E</sup> RD: Read Depth

<sup>F</sup> Amino Acids not identical to the reference are either conserved within a chemical group (polar vs. non-polar, hydrophobic, uncharged, acidic, basic) or are in a highly conserved block of amino acids (e.g. novel pathogenic PH3 allele in Supplemental Figure 2C)

<sup>1</sup> Recorded in ESP as c.779\_780insT p.G261fs

Supplemental Table 8 | Carrier frequency and prevalence based on known and predicted PH mutant alleles found in the NHLBI ESP

|                             | European American (EA) | African American (AA) | All (EA+AA) |
|-----------------------------|------------------------|-----------------------|-------------|
| <b>PH1+PH2+PH3</b>          |                        |                       |             |
| Allele Count (Alt/Ref)      | 87/8,535               | 25/4,378              | 112/12,913  |
| Mutant Allele Frequency (%) | 1.019                  | 0.571                 | 0.867       |
| Prevalence (1 in)*          | 25,812                 | 75,481                | 38,630      |
| Carrier Frequency (1 in)*   | 49                     | 88                    | 58          |
| <b>PH1 (AGXT)</b>           |                        |                       |             |
| Allele Count (Alt/Ref)      | 25/8,526               | 12/4,371              | 37/12,897   |
| Mutant Allele Frequency (%) | 0.293                  | 0.275                 | 0.287       |
| Prevalence (1 in)           | 116,308                | 132,678               | 121,499     |
| Carrier Frequency (1 in)    | 171                    | 183                   | 175         |
| <b>PH2 (GRHPR)</b>          |                        |                       |             |
| Allele Count (Alt/Ref)      | 19/8,504               | 10/4,366              | 29/12,870   |
| Mutant Allele Frequency (%) | 0.223                  | 0.229                 | 0.225       |
| Prevalence (1 in)           | 200,327                | 190,620               | 196,952     |
| Carrier Frequency (1 in)    | 224                    | 219                   | 222         |
| <b>PH3 (HOGA1)</b>          |                        |                       |             |
| Allele Count (Alt/Ref)      | 43/8,574               | 3/4,396               | 46/12,970   |
| Mutant Allele Frequency (%) | 0.502                  | 0.068                 | 0.355       |
| Prevalence (1 in)           | 39,659                 | 2,147,202             | 79,499      |
| Carrier Frequency (1 in)    | 100                    | 733                   | 141         |

\*P was determined by combining the individual prevalence of all PH types with bigenic PH cases counting as carriers.

Supplemental Table 9 | PH and PH1 carrier frequency and prevalence, excluding the common AA allele AGXT p.R289H, based on (A) known and (B) known plus predicted PH mutant alleles found in the NHLBI ESP

| <b>(A)</b>                  | <b>European American (EA)</b> | <b>African American (AA)</b> | <b>All (EA+AA)</b> |
|-----------------------------|-------------------------------|------------------------------|--------------------|
| <b>PH1+PH2+PH3</b>          |                               |                              |                    |
| Allele Count (Alt/Ref)      | 68/8,515                      | 14/4,371                     | 82/12,886          |
| Mutant Allele Frequency (%) | 0.799                         | 0.320                        | 0.636              |
| Prevalence (1 in)*          | 42,397                        | 225,971                      | 71,333             |
| Carrier Frequency (1 in)*   | 63                            | 156                          | 79                 |
| <b>PH1 (AGXT)</b>           |                               |                              |                    |
| Allele Count (Alt/Ref)      | 20/8,563                      | 4/4,389                      | 24/12,952          |
| Mutant Allele Frequency (%) | 0.234                         | 0.091                        | 0.185              |
| Prevalence (1 in)           | 183,332                       | 1,203,908                    | 291,256            |
| Carrier Frequency (1 in)    | 215                           | 549                          | 270                |
| <b>(B)</b>                  | <b>European American (EA)</b> | <b>African American (AA)</b> | <b>All (EA+AA)</b> |
| <b>PH1+PH2+PH3</b>          |                               |                              |                    |
| Allele Count (Alt/Ref)      | 85/8,550                      | 18/4,385                     | 103/12,936         |
| Mutant Allele Frequency (%) | 0.994                         | 0.410                        | 0.796              |
| Prevalence (1 in)*          | 26,780                        | 142,732                      | 44,805             |
| Carrier Frequency (1 in)*   | 51                            | 122                          | 63                 |
| <b>PH1 (AGXT)</b>           |                               |                              |                    |
| Allele Count (Alt/Ref)      | 23/8,573                      | 5/4,393                      | 28/12,966          |
| Mutant Allele Frequency (%) | 0.268                         | 0.114                        | 0.216              |
| Prevalence (1 in)           | 138,934                       | 772,079                      | 214,448            |
| Carrier Frequency (1 in)    | 187                           | 440                          | 232                |

\*P was determined by combining the individual prevalence of all PH types with bigenic PH cases counting as carriers.

## Supplemental Acknowledgement

We thank the many physicians who collected the detailed clinical records at the RKSC Participation sites: Lavjay Butani (University of California Davis-Cancer Center) and Christine Sethna (North Shore - Long Island Jewish Health System) and Contribution sites: D Adey (San Francisco, CA), S Ahmed (Seattle, WA), M Aigbe (Las Vegas, NV), M Akmal (Los Angeles, CA), S Alexander (Palo Alto, CA), M AlFadhel (Saudi Arabia), A Al-Uzri, (Portland, OR), F Amanallah (Pakistan), N Amin (Los Angeles, CA), M Anders (Argentina), S Andreoli (Indianapolis, IN), Dr. Ansell (Canada), E Arch (Wilmington, DE), Dr. Ashetti (New York, NY), Dr. Ashtari (MI), JR Asplin (Chicago, IL), A Auron (Des Moines, IA), F Ayestarian (Atlanta, GA), N Azam (Houston, TX), N Balakrishnan (India), R Baliga (Jackson, MS), HJ Baluarte (Philadelphia, PA), R Banga (Charlston, SC), M Banks (Denver, CO), S Bartosh (WI), M Baum (Boston, MA), B Becker (Fitchburg, WI), D Beckman (Faribault, MN), Dr. Beiken (New York, NY), S Belani (Petaluma, CA), A Bellucci (Lake Success, NY), R Berkseth (Minneapolis, MN), P Berry (Austin, TX), Dr. Bhadauria (India), N Bhakta (Los Angeles, CA), M Bhaskaran (Great Neck, NY), A Bhat (Roseville, CA), S Bhupalam (East Lansing, MI), M Bia (New Haven, CT), N Blatt (MI), MB Bleicher (Philadelphia, PA), A Bleyer (Winston Salem, NC), R Bloom (Philadelphia, PA), T Blydt-Hansen (Canada), JK Bodner (AZ), F Boineau (Greensville, SC), M Boone (Atlanta, GA), M Borofsky (New York, NY), B Botelho (Oakland, CA), R Bousquet (Canada), I Boydstun (Hollywood, FL), M Brandi (Argentina), J Brandt (NM), M Braun (Houston, TX), E Brewer (Houston, TX), E Brown (Dallas, TX), C Brueggmeyer (Jacksonville, FL), T Bunchman (Grand Rapids, MI), J Burke, J Burns (New York, NY), S Bynon (Birmingham, AL), M Cadnapaphornchai (Aurora, CO), J Calle (Cleveland, OH), M Cardi (Cincinnati, OH), W Carey (Cleveland, OH), E Carlisle (Canada), S Carmichael (Los Angeles, CA), E Castillo-Velarde (Peru), V Chadha (Richmond, VA), H Chakkerla (Phoenix, AZ), J Chandar (Miami, FL), M Chandra (Long Island, NY), S Chandran (San Francisco, CA), Dr. Chatha, B Chavers (MN), MJ Choi (Baltimore, MD), KB Chopra (Phoenix, AZ), F Chybowsky (Appleton, WI), F Ciuitarese (Carneigie, PA), F Coe (Chicago, IL), M Collins (Greenville, NC), F Corbin (Canada), H Corey (Morristown, NJ), SD Cramer (Winston-Salem, NC), D Creemers (Netherlands), R Cunningham (Cleveland, OH), K Dalinghaus (Canada), Dr. D'Allessandre-Silva (Hartford, CT), A Dart (Canada), Dr. Davidsson, J Davis, I Davis (Cleveland, OH), C de Souza (Uruguay), M DeBeukelaer (Toledo, OH), V Delaney (Hawthorne, NY), V Dennis (Cleveland, OH), P Devarajan (Cincinnati, OH), V Dennis (Cleveland, OH), M Dhakal (Rochester, NY), Dr. Diaz (TX), B Dixon (Cincinnati, OH), A Djamali (Madison, WI), Z Dolezel (Czech Republic), HA Doll (Tallahassee, FL), N Donin (NY), P Douville (Canada), M Dukeminier (Eugene, OR), M Dummer, K Duncan (Olathe, KS), J Durham (Orangeburg, SC), S Ecklund (Sioux Falls, SD), J Edwards, C Eggert, K Eidman (Minneapolis, MN), L Elangovan (Waukesha, WI), M Emiru (Tyler, TX), M Emmett (Alvarado, TX), S Fathalla-Shaykh (Birmingham, AL), D Fenyves (Canada), M Ferris (Chapel Hill, NC), M Fisher (Greenville, NC), C Flombaum (York Ave, NY), D Ford (Aurora, CO), J Foreman (Durham, NC), A Friedman (Syracuse, NY), C Fritsche (Milwaukee, WI), S Garcia (Spain), E Garin (Gainesville, FL), D Geary (Canada), U Gibbons (Oman), D Gipson (Chapel Hill, NC), M Glather, E Gnessin (Indianapolis, IN), S Goldberger (Farmville, VA), C Gordon (Portland, ME), T Gottheiner (Palo Alto, CA), S Goyal (West Islip NY), O Grandas (Knoxville, TN), D Grapey (Portland, OR), B Greco (Springfield, MA), L Greenbaum (Atlanta, GA), L Gregor (Canada), N Gupta (Worcester, MA), M Haddad (Sacramento, CA), Dr. Hafsteinsdottir, W Haley (Jacksonville, FL), P Hall (Cleveland, OH), M Halty (Uruguay), M Hames (Greenville, NC), CD Hanevold (Seattle, WA), C Hanna (Minneapolis, MN), F Harley (Canada), F Harris (Metairie, LA), G Hart (Charlotte, NC), E Harvey (Canada), E Heher (Boston, MA), RL Heilman (Scottsdale, AZ), R Helman (Duluth, MN), USA, J Hernandez (Seattle, WA), A Herndon (Birmingham, AL), J Herrin (Boston, MA), M Hertl (Boston, MA), G Hidalgo (Greenville, NC), P Hmiel (St. Louis, MO), R Holleman (Columbia, SC), P Holloway (England), RP Holmes (Birmingham, AL), B Hoppe (Germany), H Hotchkiss (New Brunswick, NJ), S Hsieh (Phoenix, AZ), C Hughes (Pittsburgh, PA), D Hull (Hartford, CT), T Hunley (Nashville, TN), Dr. Husmann (TN), H Ibrahim (Minneapolis, MN), V Idrovo (Columbia), M Jacobson (Lincoln, NE), T Jarrell (Columbus, GA), T Jaul, S Jernigan (Atlanta, GA), J Jetton (Iowa City, IA), L Jinadu (Baltimore, MD), J Johnston (Pittsburgh, PA), B Kaiser (Wilmington, DE), A Kalia (Galveston, TX), E Kamil (Los Angeles, CA), U Kannapadi (Pittsburgh, PA), T Kara (New Zealand), C Kashani (Minneapolis, MN), F Kaskel (Bronx, NY), A Katz

(Minneapolis, MN), V Keenan, D Kees-Folts (Hershey, PA), E Kendrick (Seattle, WA), O Khan (Chicago, IL), A Khurana (Phoenix, AZ), S Kim (E. Patchogue NY), S Knohl (Syracuse, NY), S Kobrin (Philadelphia, PA), A Kogon (New York, NY), O Kohn (Chicago, IL), B Koneru (Newark, NJ), R Kossman (Santa Fe, NM), T Kovalchik (Torrington, CT), A Krambeck (Mayo Clinic Rochester), J Kropp (Winfield, IL), A Kumar (Long Beach, CA), J Kumar (New York, NY), M Lambert (Shawnee, KS), M Lande (Rochester, NY), V Langlois (Canada), L Larch (Clarksville, IN), J Lebowitz (New Brunswick, NJ), M Lee (San Francisco, CA), WP Lee (Denver, CO), J Leiser (Indianapolis, IN), S Lerman (Los Angeles, CA), DL Levy (Bangor, ME), F Lin (New York, NY), J Lingeman (Indianapolis, IN), DS Lirenman (Canada), A Lowe (Los Angeles, CA), R Loza (Peru), J Lucia (Indianapolis, IN), N Maalouf (Chattanooga, TN), M Maddy (Duluth, MN), D Madhav (India), B Mahadeva (Oakland, CA), S Mahesh (Akron, OH), R Mallavarapu (Frederickburg, VA), C Manning (Australia), MA Mansell (United Kingdom), J Marple (Lincoln, NE), Dr. Marsha, D Martin (Euleess, TX), M Martin (Worcester, MA), R Mathias (San Francisco, CA), M Mauer (Minneapolis, MN), H Maxwell, M May (Jacksonville, FL), G Mchedlishvili (York PA), M McHugh (Columbus, OH), E McPhail (Winston-Salem, NC), N Mehta, RS Meisner (WI), S Menon (Detroit, MI), P Metcalfe (Canada), C Meyer (South Africa), A Mian (Rochester, NY), J Misurac (Indianapolis, IN), Y Miyashita (Pittsburgh, PA), P Mohan, D Mohtat (New York, NY), B Morgenstern (Phoenix, AZ), A Mubarak (Dallas, TX), M Muff-Luett (Iowa City, IA), G Murphy (Greenville, NC), C Nailescu (Indianapolis, IN), S Nampoothiri (India), M Narkewicz (Denver, CO), G Nassar (Houston, TX), A Naushabayev (Kazakhstan), M Navarro (Houston, TX), E Neimark (Providence, RI), C Nicely (Columbus, OH), C Norris (Arlington, TX), L Orihuela (Uruguay), NP Pamidi Reddy (India), M Parker, S Patel (India), R Pearl (Canada), M Pearle (Dallas, TX), S Perlman (St. Petersburg, FL), F Perwad (San Francisco, CA), S Peters (NJ), HG Pohl (Washington, DC), C Poortengia (Kingsport, TN), M Porayko (Nashville, TN), H Powell (Australia), G Prasad (India), W Primack, J Pucket (St. Kirksville, MO), D Puliyaanda (Los Angeles CA), A Quiroga (Grand Rapids, MI), R Raafat (Norfolk, VA), E Rabin (Canada), E Rademacher (Rochester, NY), S Radhakrishnan (Canada), V Ramanathan (Houston, TX), J I Ramirez (Orlando, FL), Randeree (South Africa), D Rangaswamy (India), Dr. Rao (MA), M Rashid (Rochester, NY), D Raskin (Phoenix, AZ), M Rasoulpour (Hartford, CT), R Ravichandran (India), Dr. Reddy, A Redpath, L Restall (Dallas, TX), D Reyes (Spring Hill, FL), M Rheault (Minneapolis, MN), S Riar (Kansas City, KS), S Rice (GA), C Richardson (Tacoma, WA), L Robinson (Canada), M Rocklin (Denver, CO), R Rosen, M Russo (Charolette, NC), P Sacks (Phoenix, AZ), N Saffarin (Minot, ND), A Saha (India), Dr. Saheny, S Sahney (San Bernardino, CA), J Saland (New York, NY), A Salerno (Worcester, MA), M Sanderson (Saint Paul, MN), D Sas (Mayo Clinic Rochester), D Saxauer (Sante Fe, NM), JD Scandling (Palo Alto, CA), IM Schmidt (Demark), K Schroeder (Columbus, OH), J Schwimmer (New York NY), S Sech (Asheville, NC), M Seifert (St. Louis, MO), F Sepandj (Canada), SK Sethi (India), E Shahmir (Vacaville, CA), J Sharma (Boston, MA), M Sheehan (Denver, CO), N Shenoy (India), R Sheth (San Bernardino, CA), G Shetty (India), K Sievers (Rolla, MO), E Simon (Albany, NY), D Simon (Austin, TX), J Simon (Cleveland, OH), R Sirota (Willow Grove, PA), C Smith (Minneapolis, MN), M Sobel (Westerville, OH), Dr. Solemini (Cincinnati, OH), N Soliman (Egypt), Dr. Somasundaram (Indianapolis, IN), D Spencer (Columbus, OH), M Stampfl (Lakeland, FL), T Starzl (Pittsburgh, PA), D Stein (Boston, MA), J Steinke (Grand Rapids, MI), D Steward, M Suarez (Houston, TX), B Sweet, R Swinford (Houston, TX), JM Symons (Seattle, WA), IYS Tang (Chicago, IL), A Tannenbann (Hudson, FL), P Tanpaiboon (Washington, DC), M Tanzer (Ann Arbor, MI), J Tariq (Pakistan), M Teruel (Fort Collins, CO), C Thomas (Iowa City, IA), R Thomas (New York, NY), M Tieg (Huntsville, AL), P Tiwari (Kankakee, IL), A Tolaymat (Jacksonville, FL), MM Tomsho (Summersville, WV), A Torres (Spain), A Traum (Boston, MA), K Treit (Seattle, WA), S Tuchman (Washington, DC), MA Turman (Oklahoma City, OK), R Unwin (United Kingdom), A Valdivieso (Chile), RP Valentini (Detroit, MI), F Varghese (Houston TX), M Velasco (Uruguay), R Venick (Los Angeles, CA), S Venkatesh (Nashville, TN), A Vera (Bogota, Columbia), D Veretnik (Israel), P Verghese (Minneapolis, MN), H Viko (Norway), R Villa (Lubbock, TX), J Wang (Minneapolis, MN), B Warady (Kansas City, KS), B Warsaw (Atlanta, GA), A Wasserstien (Phil, PA), C Weimer (Thibodaux, LA), J Weinstein (Dallas, TX), L Weintraub (Fairfax, VA), RA Weiss (Valhalla, NY), P Wertsch (Madison, WI), J Wesson (Milwaukee, WI), W Wilcox (Los Angeles, CA), K Winden (CA), M Winkelbauer (O'Neill, NE), C Wong (Albuquerque, NM), W Wong (Boston, MA), E Worcester (Chicago,

IL), O Yadin (Los Angeles, CA), I Yamaguchi (Seattle, WA) , B Yee (Phoenix, AZ), V Yiu (Canada), A Zolotnitskaya (Valhalla, NY)

## References

1. Rumsby, G: Primary Hyperoxaluria Mutation Database. <http://www.uclh.nhs.uk/OurServices/ServiceA-Z/PATH/PATHBIOMED/CBIO/Pages/Phmdatabase.aspx>, 2013.
2. Exome Variant Server: NHLBI GO Exome Sequencing Project (ESP), Seattle, WA (URL: <http://evs.gs.washington.edu/EVS/>) [date (01, 2014) accessed].
3. Gibbs, DA, Watts, RW: The variation of urinary oxalate excretion with age. *J Lab Clin Med*, 73: 901-908, 1969.
4. Stapenhorst, L, Sassen, R, Beck, B, Laube, N, Hesse, A, Hoppe, B: Hypocitraturia as a risk factor for nephrocalcinosis after kidney transplantation. *Pediatr Nephrol*, 20: 652-656, 2005.
